# Supplementary material for: Fibroblast gene expression following asthmatic bronchial epithelial cell conditioning correlates with epithelial donor lung function and exacerbation history
Source: PubMed Central journal article supplement (PMC6202408; doi:10.1038/s41598-018-34021-6), 2018-10-25
Supplement: 41598_2018_34021_MOESM1_ESM.pdf [file 41598_2018_34021_MOESM1_ESM.pdf]

**Title:** Fibroblast gene expression following asthmatic bronchial epithelial cell conditioning correlates with epithelial donor lung function and exacerbation history

**Authors:** Stephen R. Reeves MD, PhD<sup>1,2,3</sup>, Kaitlyn A. Barrow, BA<sup>2</sup>, Tessa K. Kolstad, BS<sup>2</sup>, Maria P. White, BA<sup>2</sup>, Lucille M. Rich, BS<sup>2</sup>, Thomas N. Wight, PhD<sup>4</sup>, Jason S. Debley MD, MPH<sup>1,2,3</sup>

From the <sup>1</sup>Division of Pulmonary Medicine, Seattle Children's Hospital, Seattle, WA.; <sup>2</sup>Center for Immunity and Immunotherapies, Seattle Children's Research Institute, Seattle, WA.; <sup>3</sup>Department of Pediatrics, University of Washington, Seattle, WA.; <sup>4</sup>Matrix Biology Program, Benaroya Research Institute, Seattle, WA.

**Supplementary Information**

| BEC Donor  | QPCR Ct values |       |        |       | alpha-SMA FMT by flow cytometry (% positive cells) | Collagen I ELISA (ng/mL) | HA ELISA (ng/mL) | PGE2 ELISA (pg/mL) | Lung function parameters (FEV1 % predicted, FEF25-75 % predicted, FEV1/FVC ratio) |          |          | History of Severe Exacerbation |
|------------|----------------|-------|--------|-------|----------------------------------------------------|--------------------------|------------------|--------------------|-----------------------------------------------------------------------------------|----------|----------|--------------------------------|
|            | GAPDH          | SMA   | COL1A1 | HAS2  |                                                    |                          |                  |                    | FEV1                                                                              | FEF25-75 | FEV1/FVC |                                |
| Healthy 1  | 18.21          | 24.45 | 21.46  | 26.60 | 2.79                                               | 2015.9                   | 4391.0           | 2594.7             | 99                                                                                | 96       | 0.84     |                                |
| Healthy 2  | 18.73          | 25.34 | 23.07  | 26.30 |                                                    | 1478.8                   | 8792.2           | 5917.9             | 139                                                                               | 104      | 0.91     |                                |
| Healthy 3  | 18.60          | 24.91 | 22.23  | 27.17 | 3.54                                               | 771.0                    | 3717.9           | 4503.4             | 115                                                                               | 106      | 0.88     |                                |
| Healthy 4  | 18.96          | 24.63 | 21.85  | 26.96 |                                                    | 1461.4                   | 4755.5           | 4870.2             | 109                                                                               | 63       | 0.77     |                                |
| Healthy 5  | 18.08          | 24.18 | 21.64  | 26.12 |                                                    | 1383.9                   | 8733.3           |                    | 113                                                                               | 130      | 0.97     |                                |
| Healthy 6  | 17.19          | 23.47 | 20.59  | 25.03 | 3.21                                               | 1863.5                   | 6380.4           | 347.3              | 121                                                                               | 119      | 0.91     |                                |
| Healthy 7  | 18.06          | 24.92 | 21.85  | 27.32 |                                                    | 485.0                    | 1200.9           | 3409.2             | 99                                                                                | 91       | 0.95     |                                |
| Healthy 8  | 18.76          | 25.79 | 23.33  | 28.34 | 4.74                                               | 294.5                    | 2024.9           | 5560.0             | 81                                                                                | 99       | 0.89     |                                |
| Healthy 9  | 21.59          | 27.34 | 24.02  | 26.40 |                                                    |                          |                  |                    | 115                                                                               | 83       | 0.81     |                                |
| Healthy 10 | 20.54          | 25.99 | 23.29  | 25.84 |                                                    |                          |                  |                    | 111                                                                               | 77       | 0.84     |                                |
| Healthy 11 | 21.16          | 29.62 | 25.43  | 29.65 |                                                    |                          |                  |                    | 102                                                                               | 97       | 0.87     |                                |
| Healthy 12 | 20.12          | 28.28 | 23.08  | 25.68 | 2.1                                                |                          |                  |                    | 105                                                                               | 79       | 0.85     |                                |
| Healthy 13 | 20.08          | 25.63 | 22.91  | 27.14 | 5.8                                                | 2867.8                   | 3893.2           | 530.9              | 92                                                                                | 80       | 0.90     |                                |
| Healthy 14 | 19.72          | 25.37 | 22.40  | 27.72 | 2                                                  | 2567.8                   | 5077.7           | 133.2              | 113                                                                               | 138      | 0.98     |                                |
| Healthy 15 | 19.14          | 25.63 | 22.49  | 26.94 | 1.60                                               | 1665.7                   | 3321.3           | 127.9              | 107                                                                               | 104      | 0.88     |                                |
| Asthma 1   | 20.07          | 25.06 | 22.60  | 25.62 |                                                    | 1235.0                   | 16978.0          | 1390.0             | 79                                                                                | 55       | 0.75     | Yes                            |
| Asthma 2   | 19.97          | 24.78 | 22.47  | 25.91 |                                                    | 1311.7                   | 12590.9          | 4123.0             | 98                                                                                | 77       | 0.79     | Yes                            |
| Asthma 3   | 20.92          | 25.75 | 21.81  | 26.37 | 9.31                                               | 1593.8                   | 3166.0           |                    | 82                                                                                | 59       | 0.82     | Yes                            |
| Asthma 4   | 19.01          | 24.12 | 22.23  | 25.84 | 2.30                                               | 1138.3                   | 7701.6           | 3960.5             | 85                                                                                | 82       | 0.85     | No                             |
| Asthma 5   | 18.40          | 24.12 | 21.43  | 26.36 |                                                    | 1682.5                   | 10534.2          | 33.7               | 79                                                                                | 68       | 0.81     | No                             |
| Asthma 6   | 19.57          | 25.20 | 21.64  | 26.97 | 5.86                                               | 936.4                    | 6384.7           | 1911.1             | 94                                                                                | 74       | 0.91     | Yes                            |
| Asthma 7   | 19.73          | 25.52 | 21.91  | 26.44 | 5.35                                               | 2381.2                   | 14059.0          | 499.1              | 89                                                                                | 81       | 0.83     | Yes                            |
| Asthma 8   | 18.92          | 24.99 | 21.48  | 27.17 | 3.20                                               | 910.4                    | 4396.6           | 4653.2             | 116                                                                               | 105      | 0.90     | Yes                            |
| Asthma 9   | 17.50          | 23.84 | 21.09  | 25.77 | 4.40                                               | 1690.0                   | 10037.4          | 4024.6             | 113                                                                               | 98       | 0.85     | No                             |
| Asthma 10  | 19.87          | 26.05 | 23.25  | 28.27 |                                                    | 1473.6                   | 6531.8           | 1247.3             | 92                                                                                | 78       | 0.83     | No                             |
| Asthma 11  | 17.85          | 24.22 | 22.88  | 26.54 | 11.90                                              | 757.9                    | 5554.6           | 3637.2             | 85                                                                                | 89       | 0.84     | No                             |
| Asthma 12  | 20.29          | 25.43 | 22.06  | 25.54 | 10.30                                              | 6466.9                   | 2842.6           | 1151.6             | 58                                                                                | 34       | 0.64     | Yes                            |
| Asthma 13  | 20.50          | 25.35 | 22.11  | 24.80 | 8.10                                               | 2120.5                   | 3217.9           | 1551.0             | 82                                                                                | 61       | 0.75     | Yes                            |
| Asthma 14  | 20.22          | 25.33 | 22.50  | 24.05 |                                                    |                          |                  |                    | 78                                                                                | 101      | 0.84     | Yes                            |
| Asthma 15  | 20.76          | 25.99 | 22.90  | 26.04 |                                                    |                          |                  |                    | 89                                                                                | 82       | 0.75     | Yes                            |
| Asthma 16  | 21.26          | 25.96 | 20.34  | 28.07 | 14.50                                              | 3994.4                   | 3932.8           | 614.0              | 77                                                                                | 47       | 0.79     | No                             |
| Asthma 17  | 20.63          | 25.30 | 20.01  | 27.20 |                                                    | 4152.5                   | 5797.5           | 143.6              | 86                                                                                | 66       | 0.79     | No                             |
| Asthma 18  | 20.94          | 25.80 | 19.92  | 27.75 |                                                    | 5191.9                   | 3809.1           | 35.3               | 64                                                                                | 58       | 0.79     | Yes                            |
| Asthma 19  | 20.55          | 25.23 | 19.71  | 27.11 |                                                    | 11141.1                  | 5114.4           | 502.2              | 73                                                                                | 42       | 0.7      | No                             |
| Asthma 20  | 20.69          | 25.41 | 19.87  | 27.27 |                                                    | 4154.6                   | 5262.7           | 805.9              | 88                                                                                | 63       | 0.76     | No                             |
| Asthma 21  | 20.94          | 25.06 | 20.14  | 27.83 |                                                    | 2842.1                   | 3739.9           | 568.8              | 78                                                                                | 59       | 0.73     | No                             |
| Asthma 22  | 21.11          | 25.81 | 20.15  | 27.59 |                                                    | 4765.2                   | 2737.3           | 1189.3             | 85                                                                                | 78       | 0.77     | Yes                            |
| Asthma 23  | 20.56          | 25.68 | 20.49  | 26.97 |                                                    | 3380.2                   | 4072.0           | 2079.4             | 97                                                                                | 70       | 0.7      | Yes                            |
